# Supplementary material for: Does long-term fire suppression impact leaf litter breakdown and aquatic invertebrate colonization in pine flatwoods wetlands?
Source: PeerJ. 2021 Nov 29;9:e12534. doi: 10.7717/peerj.12534 (PMC8638572; doi:10.7717/peerj.12534)
Supplement: Supplemental Information 1 [file peerj-09-12534-s001.xlsx]

## Sheet: Sheet1
Pond	Species	Habitat Type	Replicate	Days Submerged	Initial Weight (g)	Weight Remaining (g)	Weight Lost (g)	Isopoda	Amphipoda	Anostraca	Cladocera	Copepoda	Decapoda	Diptera	Hemiptera	Coleoptera	Odonata	Anisoptera	Zygoptera	Trichoptera	Acariformes	Collembola	Gastropoda	Notes
P12	Nyssa sylvatica	Fire-suppressed	1	103	15	7.48	7.52	178	15	0	2	5	0	49	0	0	0	0	0	0	16	0	1
P12	Aristida stricta	Fire-suppressed	1	103	15	11.98	3.02	46	0	0	67	7	0	10	0	0	0	0	0	0	452	0	0
P12	Pinus palustris	Fire-suppressed	1	103	15	11.31	3.69	14	0	0	25	3	0	10	0	0	0	0	0	0	223	0	0
P12	Nyssa sylvatica	Fire-suppressed	2	103	15	7.2	7.8	51	3	0	26	8	0	17	0	1	0	0	0	0	204	1	8
P12	Aristida stricta	Fire-suppressed	2	103	15	11.76	3.24	144	8	0	4	4	0	5	0	0	0	0	0	0	258	0	1
P12	Pinus palustris	Fire-suppressed	2	103	15	10.6	4.4	20	14	0	5	0	0	15	0	0	0	0	0	0	99	0	1
P12	Nyssa sylvatica	Fire-suppressed	3	103	15	7.95	7.05	122	9	0	14	15	0	52	0	1	0	0	0	0	100	0	2
P12	Aristida stricta	Fire-suppressed	3	103	15	11.85	3.15	26	13	0	6	10	0	6	0	0	0	0	0	0	306	0	0
P12	Pinus palustris	Fire-suppressed	3	103	15	11.07	3.93	33	22	0	10	4	0	19	0	0	0	0	0	0	226	0	4
P12	Nyssa sylvatica	Fire-maintained	1	103	15	8.22	6.78	53	2	0	29	0	0	7	0	0	0	0	0	0	12	1	1
P12	Aristida stricta	Fire-maintained	1	103	15	11.74	3.26	56	0	0	50	0	0	4	1	0	0	0	0	0	29	0	3
P12	Pinus palustris	Fire-maintained	1	103	15	11.37	3.63	59	2	0	28	0	0	4	0	1	0	0	1	0	30	0	7
P12	Nyssa sylvatica	Fire-maintained	2	103	15	7.79	7.21	95	0	0	15	0	0	17	0	0	0	0	0	0	7	1	2
P12	Aristida stricta	Fire-maintained	2	103	15	11.95	3.05	11	6	0	21	1	0	1	0	0	0	0	1	0	43	0	0
P12	Pinus palustris	Fire-maintained	2	103	15	11.26	3.74	24	8	0	24	1	0	1	0	0	0	0	0	0	18	1	1
P12	Nyssa sylvatica	Fire-maintained	3	103	15	7.88	7.12	107	1	0	37	2	0	14	0	0	0	0	2	0	10	0	5
P12	Aristida stricta	Fire-maintained	3	103	15	11.88	3.12	100	17	0	58	0	0	8	0	1	0	0	0	0	36	0	1
P12	Pinus palustris	Fire-maintained	3	103	15	11.09	3.91	37	0	0	21	0	0	5	1	0	0	0	1	0	13	0	2
P16	Nyssa sylvatica	Fire-suppressed	1	103	15	8.22	6.78	124	5	0	2	2	0	18	0	0	0	0	0	0	1	0	0
P16	Aristida stricta	Fire-suppressed	1	103	15	12.19	2.81	206	4	0	217	1	0	36	0	0	0	0	0	0	19	0	0
P16	Pinus palustris	Fire-suppressed	1	103	15	11.37	3.63	160	6	0	11	2	0	41	0	0	0	0	0	0	2	0	0
P16	Nyssa sylvatica	Fire-suppressed	2	103	15	7.41	7.59	232	8	0	31	4	0	45	0	0	0	0	0	0	4	0	0
P16	Aristida stricta	Fire-suppressed	2	103	15	11.87	3.13	76	3	0	8	1	0	28	0	0	0	0	0	0	16	0	0
P16	Pinus palustris	Fire-suppressed	2	103	15	11.54	3.46	87	22	0	9	1	0	2	0	1	0	0	0	0	9	0	1
P16	Nyssa sylvatica	Fire-suppressed	3	103	15	7.48	7.52	359	10	1	13	8	0	28	0	0	0	0	0	0	9	0	0
P16	Aristida stricta	Fire-suppressed	3	103	15	12.1	2.9	154	4	0	16	6	0	16	0	0	0	0	0	0	41	3	0
P16	Pinus palustris	Fire-suppressed	3	103	15	11.19	3.81	47	12	0	2	1	0	25	1	0	1	0	0	0	2	0	0
P16	Nyssa sylvatica	Fire-maintained	1	103	15	7.86	7.14	79	69	0	2	2	0	8	0	0	0	0	0	0	3	0	0
P16	Aristida stricta	Fire-maintained	1	103	15	11.68	3.32	85	0	0	32	0	0	5	0	1	0	0	0	0	38	0	0
P16	Pinus palustris	Fire-maintained	1	103	15	11.42	3.58	25	1	0	20	1	0	6	0	0	0	0	0	0	23	0	0
P16	Nyssa sylvatica	Fire-maintained	2	103	15	7.17	7.83	186	1	0	95	7	0	9	0	0	0	0	0	0	16	0	0
P16	Aristida stricta	Fire-maintained	2	103	15	11.22	3.78	118	2	0	13	0	0	3	0	0	0	0	0	0	11	0	0
P16	Pinus palustris	Fire-maintained	2	103	15	11.54	3.46	10	0	0	0	0	0	4	0	0	0	0	0	0	5	0	0
P16	Nyssa sylvatica	Fire-maintained	3	103	15	8.2	6.8	101	3	0	2	0	0	11	0	0	0	0	0	0	5	0	0
P16	Aristida stricta	Fire-maintained	3	103	15	11.83	3.17	18	4	0	2	0	0	1	0	0	0	0	0	0	13	0	0
P16	Pinus palustris	Fire-maintained	3	103	15	11.22	3.78	18	1	0	1	0	0	0	0	0	0	0	0	0	2	0	0
P53	Nyssa sylvatica	Fire-suppressed	1	25	15	10.65	4.35	0	0	0	10	0	0	28	0	0	0	0	0	0	3	0	0
P53	Aristida stricta	Fire-suppressed	1	25	15	12.2	2.8	0	1	0	10	0	0	30	0	0	0	0	0	0	1	0	0
P53	Pinus palustris	Fire-suppressed	1	25	15	12.21	2.79	1	1	0	40	3	0	33	0	0	0	0	0	0	2	1	0
P53	Nyssa sylvatica	Fire-suppressed	2	25	15	10.75	4.25	1	1	0	6	2	0	26	0	0	0	0	0	0	1	0	0
P53	Aristida stricta	Fire-suppressed	2	25	15	12.13	2.87	0	1	0	0	0	0	12	0	0	0	0	0	0	1	0	0
P53	Pinus palustris	Fire-suppressed	2	25	15	11.77	3.23	0	1	0	0	0	0	26	0	0	0	0	0	0	1	0	0
P53	Nyssa sylvatica	Fire-suppressed	3	25	15	10.41	4.59	0	0	0	6	2	0	31	0	0	0	0	0	0	0	1	0
P53	Aristida stricta	Fire-suppressed	3	25	15	12.46	2.54	1	4	0	10	0	0	50	0	0	0	0	0	0	1	0	0
P53	Pinus palustris	Fire-suppressed	3	25	15	11.8	3.2	0	3	0	4	1	0	43	0	0	0	0	0	0	0	0	0
P53	Nyssa sylvatica	Fire-maintained	1	25	15	10.2	4.8	53	3	0	217	0	0	21	0	2	0	5	1	0	11	0	30
P53	Aristida stricta	Fire-maintained	1	25	15	12.22	2.78	38	2	0	138	0	0	63	0	0	0	0	4	1	99	0	1
P53	Pinus palustris	Fire-maintained	1	25	15	11.62	3.38	18	8	0	43	0	0	47	0	1	0	0	4	0	24	0	8
P53	Nyssa sylvatica	Fire-maintained	2	25	15	10.21	4.79	51	1	0	213	3	0	23	0	0	0	5	2	1	52	0	28
P53	Aristida stricta	Fire-maintained	2	25	15	12	3	70	5	0	111	0	0	36	0	0	0	0	5	0	47	0	5
P53	Pinus palustris	Fire-maintained	2	25	15	11.08	3.92	NA	NA	NA	NA	NA	NA	NA	NA	NA	NA	NA	NA	NA	NA	NA	NA	No invertebrate data
P53	Nyssa sylvatica	Fire-maintained	3	25	15	9.53	5.47	49	4	0	153	0	2	21	0	0	0	4	3	0	21	0	6
P53	Aristida stricta	Fire-maintained	3	25	15	12.05	2.95	46	0	0	110	2	0	58	0	0	0	1	1	1	39	0	0
P53	Pinus palustris	Fire-maintained	3	25	15	11.99	3.01	20	2	0	85	1	0	82	0	2	0	0	9	0	52	0	3
P53	Nyssa sylvatica	Fire-suppressed	1	104	15	9.49	5.51	3	14	0	5	3	0	47	0	0	0	0	0	0	0	0	0
P53	Aristida stricta	Fire-suppressed	1	104	15	12.38	2.63	12	3	0	8	2	0	14	0	0	0	0	0	0	2	0	0
P53	Pinus palustris	Fire-suppressed	1	104	15	11.55	3.45	2	2	0	5	0	0	23	0	0	0	0	0	0	1	0	0
P53	Nyssa sylvatica	Fire-suppressed	2	104	15	9.28	5.72	75	7	0	76	19	0	49	0	0	0	0	0	0	11	2	0
P53	Aristida stricta	Fire-suppressed	2	104	15	7.72	7.28	11	5	0	181	6	0	27	0	0	0	0	0	0	5	0	0	Not included in analysis because of omitted decomposition data
P53	Pinus palustris	Fire-suppressed	2	104	15	11.62	3.38	1	0	0	3	0	0	15	1	0	0	0	0	0	3	0	0
P53	Nyssa sylvatica	Fire-suppressed	3	104	15	9.37	5.63	20	6	0	38	5	0	39	0	0	0	0	0	0	0	0	0
P53	Aristida stricta	Fire-suppressed	3	104	15	11.97	3.03	49	84	0	52	14	0	61	0	0	0	0	0	0	6	0	0
P53	Pinus palustris	Fire-suppressed	3	104	15	11.81	3.19	9	7	0	16	1	0	72	0	0	0	0	0	0	4	0	0
P53	Nyssa sylvatica	Fire-maintained	1	104	15	7.56	7.44	83	4	0	66	12	1	19	0	0	0	1	1	0	13	0	35
P53	Aristida stricta	Fire-maintained	1	104	15	11.63	3.37	115	4	0	142	4	0	17	0	3	0	0	7	0	105	0	13
P53	Pinus palustris	Fire-maintained	1	104	15	11.54	3.46	20	0	0	31	2	0	13	0	0	0	0	1	0	152	0	1
P53	Nyssa sylvatica	Fire-maintained	2	104	15	7.6	7.4	88	2	0	501	6	0	6	0	0	0	0	2	0	78	0	35
P53	Aristida stricta	Fire-maintained	2	104	15	11.8	3.2	126	5	0	278	2	0	31	0	2	0	1	7	0	137	0	1
P53	Pinus palustris	Fire-maintained	2	104	15	11.65	3.35	125	1	0	190	4	0	19	0	0	0	2	7	0	109	0	8
P53	Nyssa sylvatica	Fire-maintained	3	104	15	7.27	7.73	153	31	0	961	7	1	20	0	1	0	4	4	0	49	0	52
P53	Aristida stricta	Fire-maintained	3	104	15	11.52	3.48	196	11	0	554	4	0	39	1	7	0	0	9	0	211	0	3
P53	Pinus palustris	Fire-maintained	3	104	15	11.58	3.42	65	5	0	261	1	0	35	0	0	0	0	4	0	159	0	6
